# Supplementary material for: Bio-orthogonal crosslinking and hyaluronan facilitate transparent healing after treatment of deep corneal injuries with in situ-forming hydrogels
Source: PubMed Central journal article supplement (PMC11794660; doi:10.1038/s41536-024-00385-9), 2025-02-04
Supplement: 41536_2024_385_MOESM1_ESM.pdf [file 41536_2024_385_MOESM1_ESM.pdf]

## Bio-Orthogonal Crosslinking and Hyaluronan Facilitate Transparent Healing after Treatment of Deep Corneal Injuries with In Situ-Forming Hydrogels

**Authors:** Fang Chen<sup>†, ‡</sup>, Uiyoung Han<sup>†, ‡</sup>, Thitima Wungcharoen<sup>†</sup>, Youngyoon Amy Seo<sup>†</sup>, Peter Le<sup>†, ‡</sup>, Li Jiang<sup>†</sup>, Nae-Won Kang<sup>†</sup>, Euisun Song<sup>†</sup>, Kyeongwoo Jang<sup>†</sup>, David Mundy<sup>†</sup>, Gabriella Maria Fernandes-Cunha<sup>†</sup>, Sarah Heilshorn<sup>#</sup>, David Myung<sup>†, ‡, §, \*</sup>

### Affiliations:

<sup>†</sup> Spencer Center for Vision Research, Byers Eye Institute, Stanford University School of Medicine, Palo Alto, CA, USA.

<sup>‡</sup> VA Palo Alto Health Care System; Palo Alto, CA, United States.

<sup>§</sup> Chemical Engineering, Stanford University, CA, United States.

\* Corresponding author. Email: djmyung@stanford.edu.

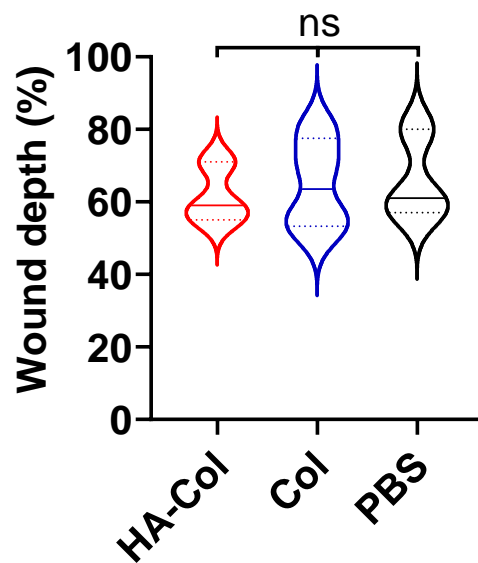

**Supplementary Figure 1. Corneal wound depth in rats.** The average corneal wound depths were around 64%. According to ordinary one-way ANOVA analysis, there were no significant differences in wound depths among groups. HA: hyaluronic acid, Col: collagen, PBS: phosphate buffer solution, ns: non-significant. Created in GraphPad Prism 10.

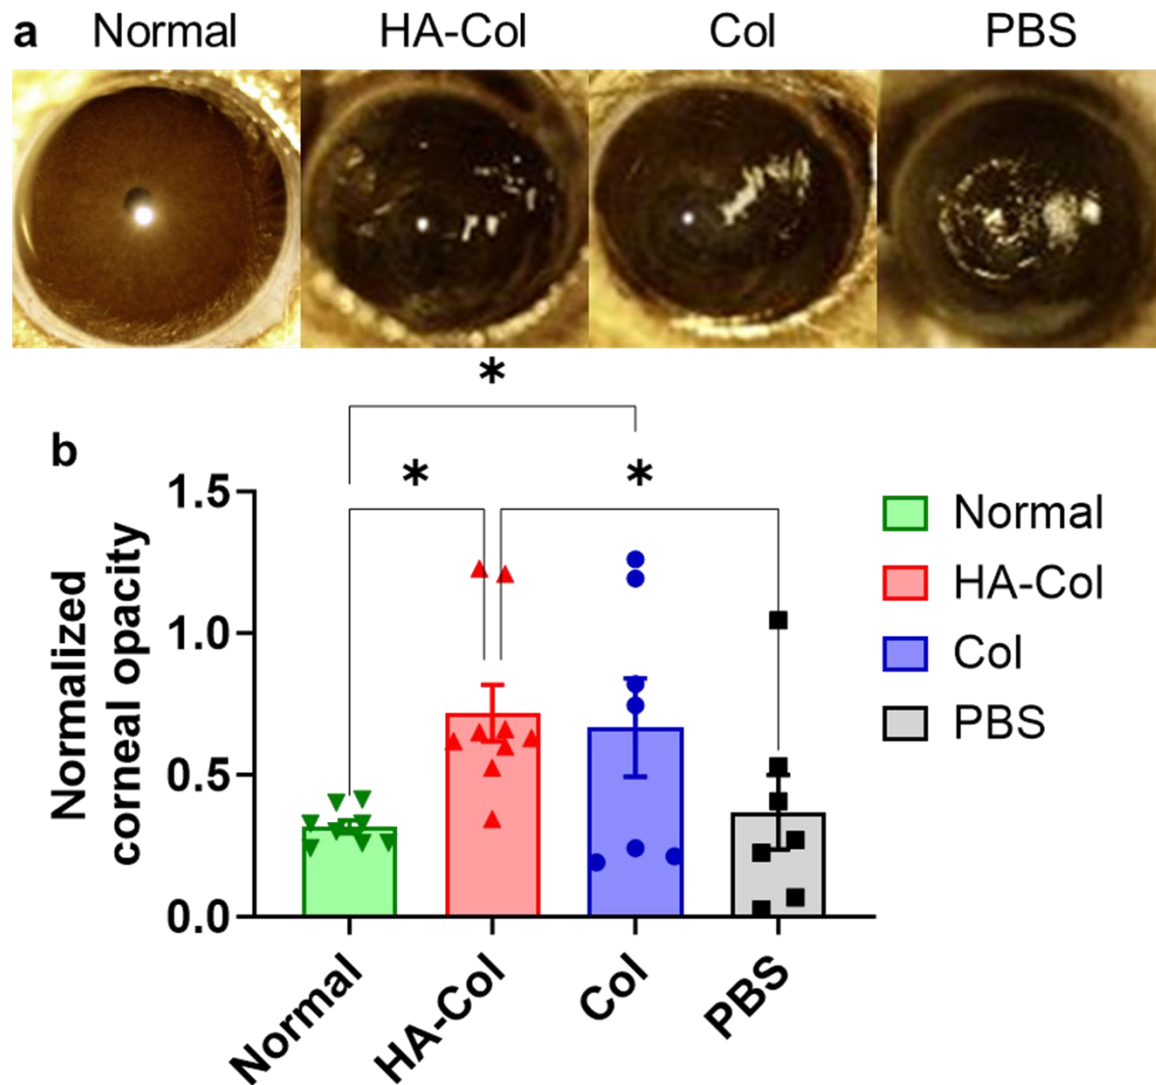

**Supplementary Figure 2. HA-Col and Col click gels increased corneal opacity immediately after treatment.** (A) Photo of a normal rat cornea. (B) Quantification of opacity in normal and wounded rat corneas immediately after injury and PBS or gel treatments. Data present mean  $\pm$  SEM.  $n = 8$  (normal and PBS groups), 9 (HA-Col group), or 7 (Col group). Ordinary one-way ANOVA analysis was used to calculate the p values. \*  $p < 0.05$ . HA: hyaluronic acid, Col: collagen, PBS: phosphate buffer solution, ns: non-significant. Graph was created in GraphPad Prism 10.

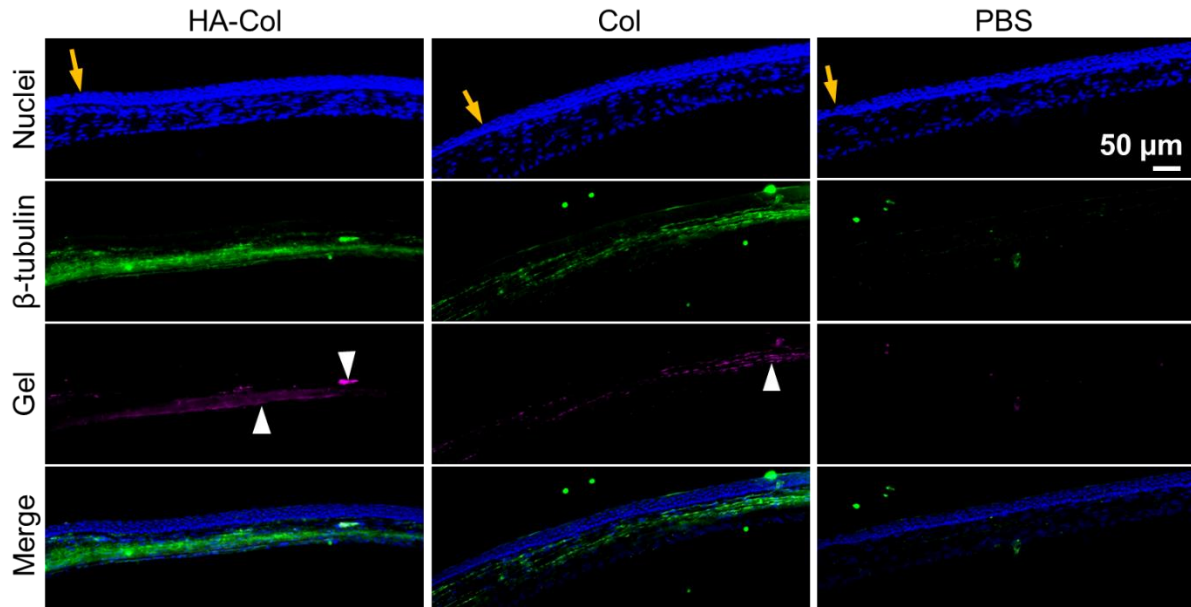

**Supplementary Figure 3. Gel retention and  $\beta$ -tubulin staining of the rat corneas.** After 2 months of treatment with gels, the corneas showed a trace of gel in the neo-stroma area.  $\beta$ -tubulin staining was more profound in the gels-treated groups than in the PBS-treated group. HA: hyaluronic acid, Col: collagen, PBS: phosphate buffer solution.

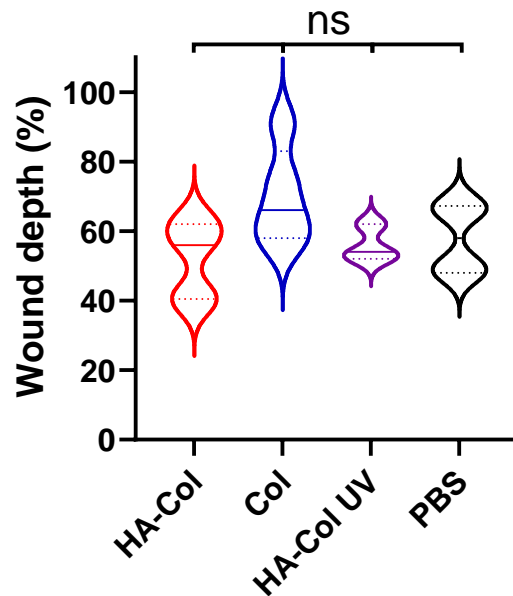

**Supplementary Figure 4. Corneal wound depth in rabbits.** The average corneal wound depths were around 60%. There were no significant differences in wound depth among groups according to an ordinary one-way ANOVA analysis. HA: hyaluronic acid, Col: collagen, PBS: phosphate buffer solution, ns: non-significant. Created in GraphPad Prism 10.

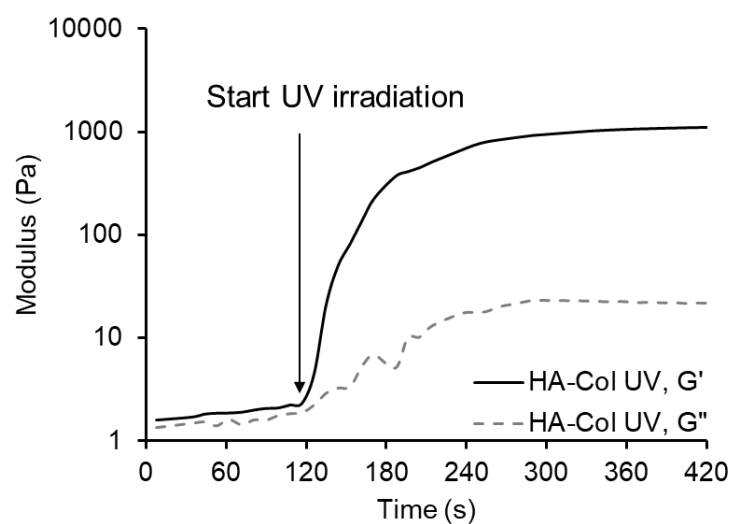

**Supplementary Figure 5. In situ rheology test of HA-Col UV gel.** The HA-Col UV gel formed upon UV irradiation, and the storage modulus reached 70% of the maximum strength after 1 minute UV irradiation. HA: hyaluronic acid, Col: collagen. Created in Microsoft Office 2016 Excel.
